# Supplementary material for: A direct Z-scheme photocatalyst PtS2/HfGe2N4 van der Waals heterostructure for highly efficient water splitting: first-principles study
Source: Royal Society of Chemistry journal article supplement (doi:10.1039/d4ce00956h), 2024-01-01
Supplement: d4ce00956h1.pdf [file d4ce00956h1.pdf]

**Electronic Supplementary Information**

**A direct Z-scheme photocatalyst PtS<sub>2</sub>/HfGe<sub>2</sub>N<sub>4</sub> van der Waals  
heterostructure for highly efficient water splitting: First-  
principles study**

Wen Qiao\*, Xinzhuo Zhang, Shiming Yan\*, Ru Bai, Tiejun Zhou  
School of Electronics and Information, Hangzhou Dianzi University, Hangzhou 310018, China

\*Corresponding author:

E-mail address: qiaow@hdu.edu.cn (Wen Qiao), shimingyan@hdu.edu.cn (Shiming Yan).

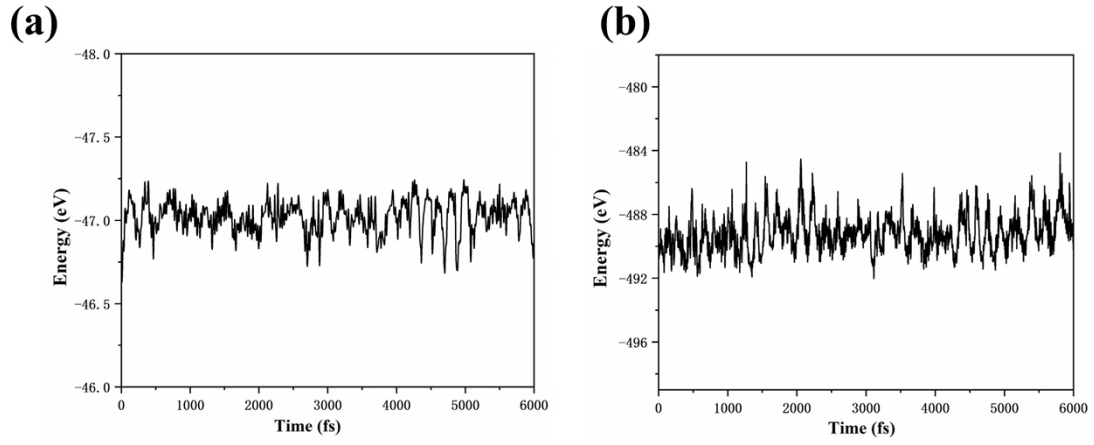

**Fig. S1.** The AIMD simulation at 300 K of PtS<sub>2</sub> (a) and HfGe<sub>2</sub>N<sub>4</sub> (b)

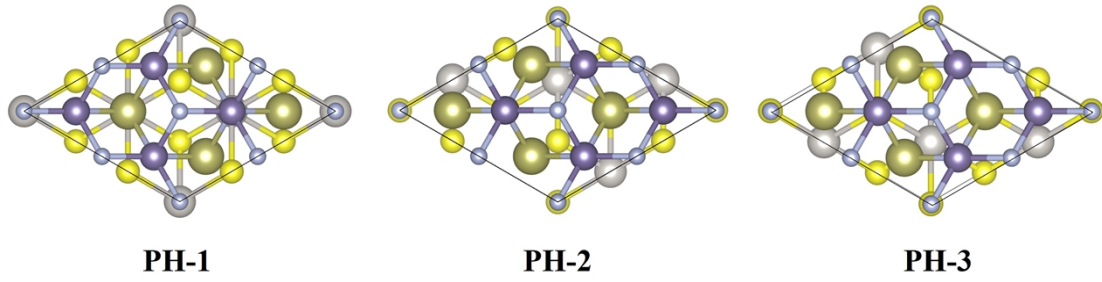

**Fig. S2.** The structures of PtS<sub>2</sub>/HfGe<sub>2</sub>N<sub>4</sub> heterostructures with different configurations.

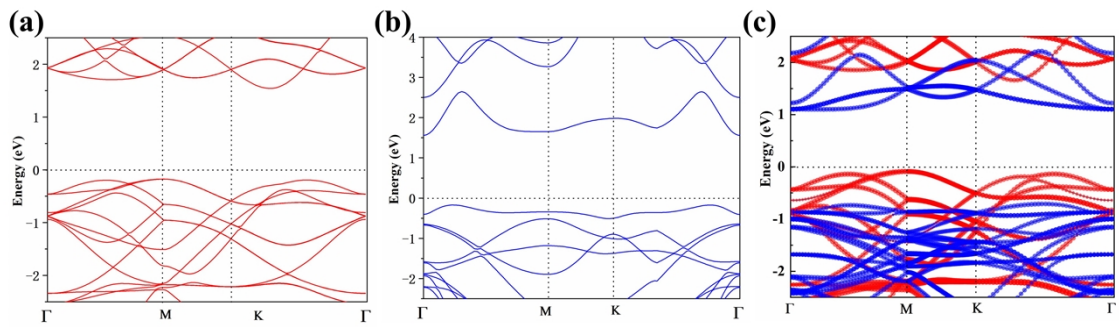

**Fig. S3.** Band structures of  $\sqrt{3} \times \sqrt{3}$  supercell PtS<sub>2</sub> (a), a unit cell HfGe<sub>2</sub>N<sub>4</sub> (b) and PtS<sub>2</sub>/HfGe<sub>2</sub>N<sub>4</sub> heterostructure (c) calculated using PBE functional.

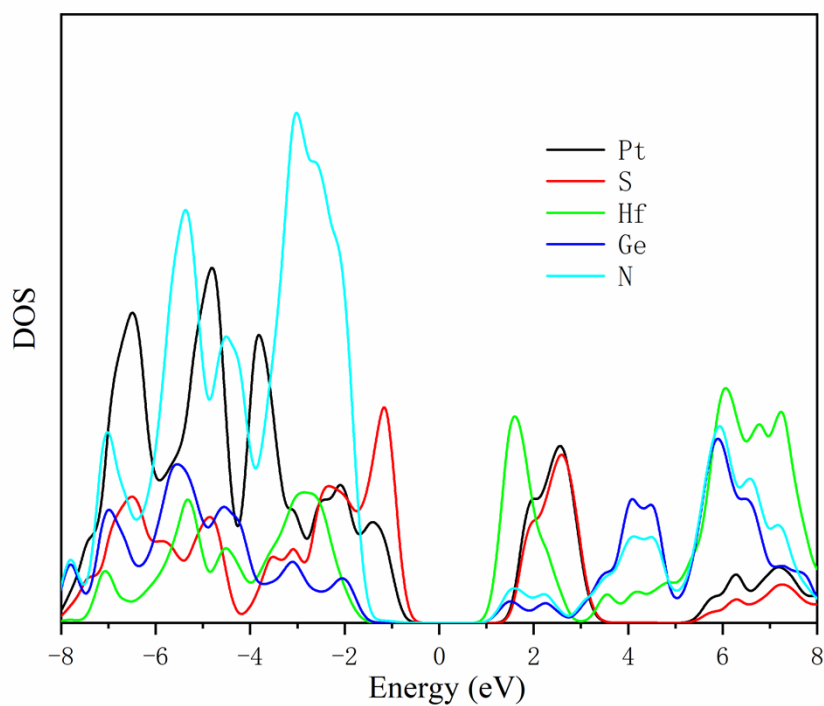

**Fig. S4.** Projected density of states of PtS<sub>2</sub>/HfGe<sub>2</sub>N<sub>4</sub> heterostructure.

**Table S1**

Calculated zero-point energy correction ( $E_{ZPE}$ ), entropy contribution ( $-TS$ ,  $T=298.15\text{K}$ ), total energy ( $E$ ).

|      | $E_{ZPE}$ (eV) | $-TS$ (eV) | $E$ (eV) |
|------|----------------|------------|----------|
| *    | /              | /          | -268.02  |
| *O   | 0.08           | -0.06      | -272.04  |
| *OH  | 0.37           | -0.09      | -276.30  |
| *OOH | 0.38           | -0.15      | -281.42  |
| *H   | 0.19           | -0.03      | -270.71  |
